# Supplementary material for: Imprinting modulates processing of visual information in the visual wulst of chicks
Source: PubMed Central journal article supplement (PMC1657023; doi:10.1186/1471-2202-7-75), 2006-11-14
Supplement: 1471-2202-7-75-S2.pdf [file 1471-2202-7-75-S2.pdf]

**a** Imprinting with a blue square (AM667)

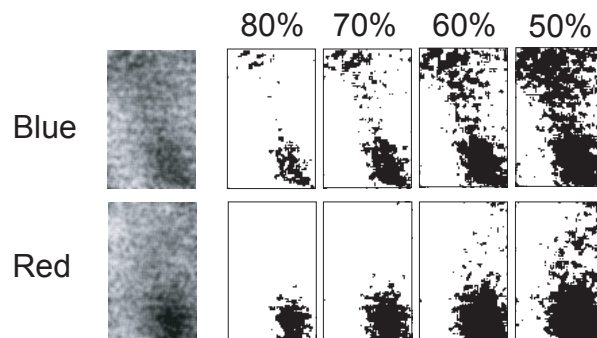

**b** Imprinting with a red square (AM675)

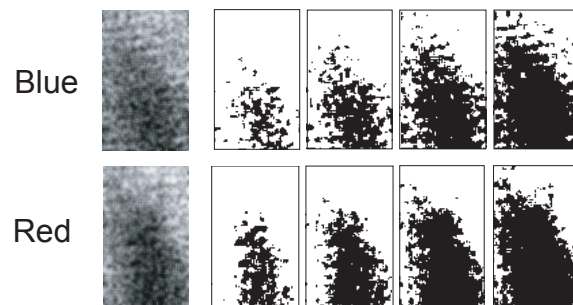

**c** No imprinting (AM663)

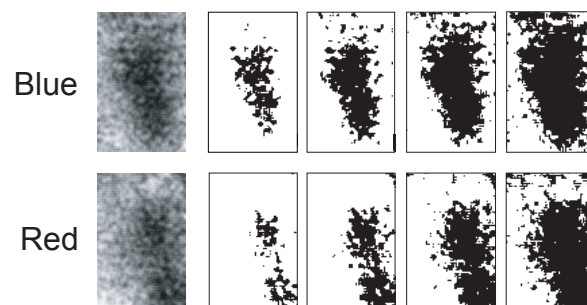

**Additional File 2** The evoked activity area at four threshold levels. Response regions at indicated levels of the maximum response are shown in black. Recordings from a chick imprinted with a blue square (a), a red square (b) or no imprinting (c). Upper and lower panels in a, b and c are the responses to the blue or red square, respectively.
