# Supplementary material for: Imprinting modulates processing of visual information in the visual wulst of chicks
Source: PubMed Central journal article supplement (PMC1657023; doi:10.1186/1471-2202-7-75), 2006-11-14
Supplement: 1471-2202-7-75-S3.pdf [file 1471-2202-7-75-S3.pdf]

Imp with blue

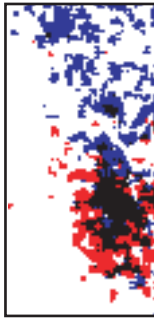

AM657

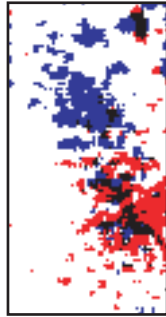

AM658

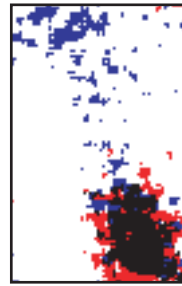

AM667

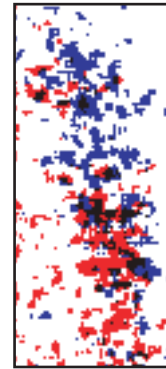

AM690

Imp with red

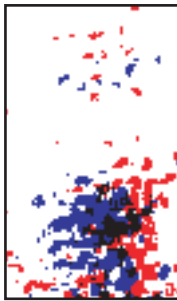

AM673

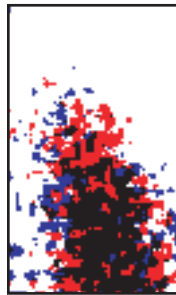

AM675

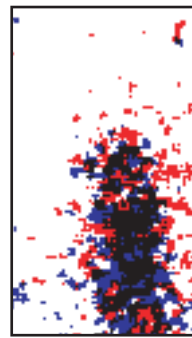

AM686

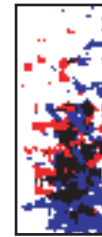

AM688

No imp

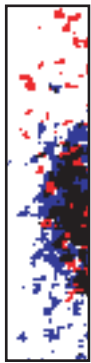

AM659

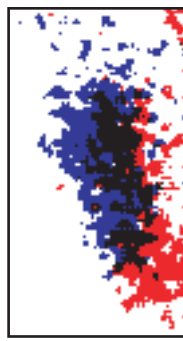

AM663

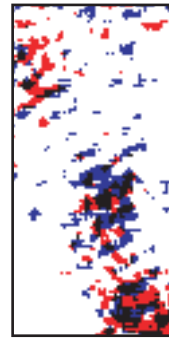

AM693

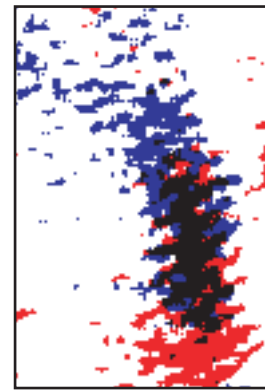

AM695

-  Blue-responsive area
-  Blue- and red-responsive area
-  red-responsive area

**Additional File 3** The evoked activity area at 70% threshold levels in each condition (imprinting with a blue square, a red square or no imprinting).
