# Supplementary material for: Imprinting modulates processing of visual information in the visual wulst of chicks
Source: PubMed Central journal article supplement (PMC1657023; doi:10.1186/1471-2202-7-75), 2006-11-14
Supplement: 1471-2202-7-75-S4.pdf [file 1471-2202-7-75-S4.pdf]

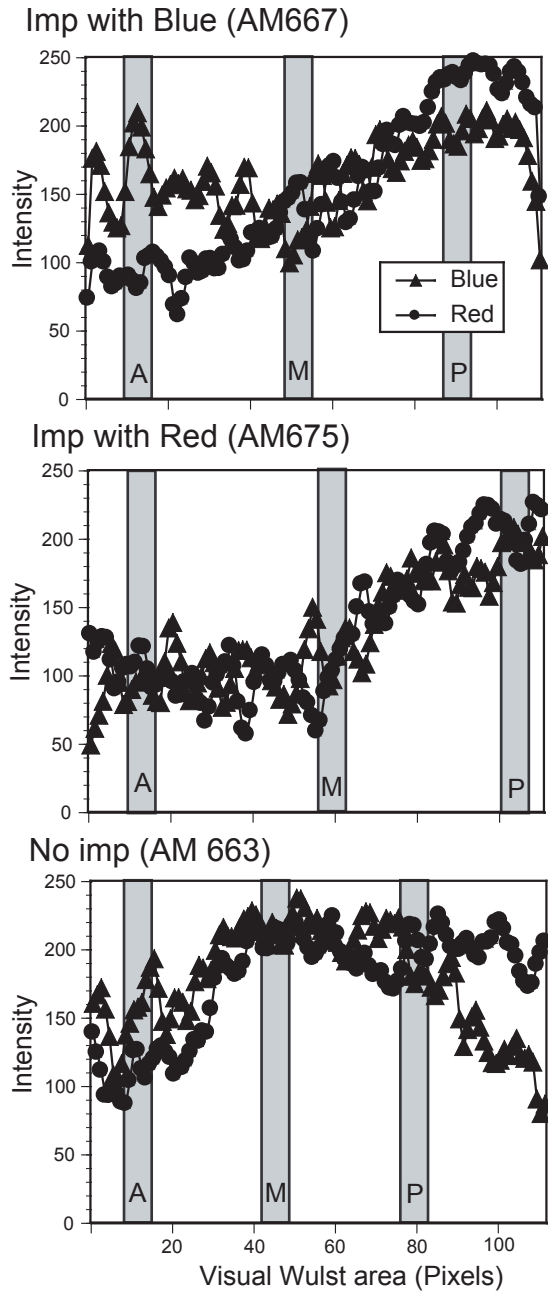

**Additional File 4** Changes in intensity along antero-posterior axis. The examples of responses in each condition (imprinting with a blue square, a red square or no imprinting) were shown. Horizontal axis indicates the area along antero-posterior axis (anterior is the left). Shaded area indicates the ROI corresponding to the anterior(A), middle(M) and posterior(P) loci selected for the slope measure.
